# Supplementary material for: Three-dimensional photolithographic micropatterning: a novel tool to probe the complexities of cell migration
Source: Royal Society of Chemistry journal article supplement (doi:10.1039/c3ib20280a), 2013-01-01
Supplement: c3ib20280a.pdf [file c3ib20280a.pdf]

### Supplementary Figures

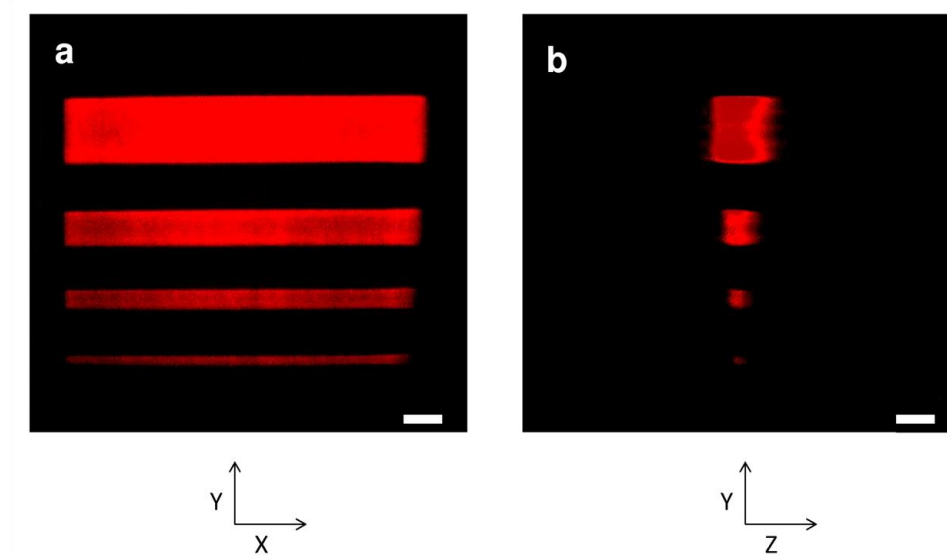

**Supplementary Figure 1: 3D Patterns of PEG-RGDS Vary in Width and Height.** PEG-RGDS micropatterns within a PEG-PQ hydrogel are shown. (a) Straight on (XY) view of micropatterns showing a constant 500  $\mu\text{m}$  length and various widths of 100, 50, 25, and 10  $\mu\text{m}$ . (b) Cross sectional (YZ) view of micropatterns showing that the patterns have controlled widths and heights. From top to bottom the YZ dimensions of the patterns are 100 x 100  $\mu\text{m}$ , 50 x 50  $\mu\text{m}$ , 25 x 25  $\mu\text{m}$ , and 10 x 10  $\mu\text{m}$ . Scale bar = 50  $\mu\text{m}$ .
